# Supplementary material for: Solubility and Decomposition of Organic Compounds in Subcritical Water
Source: MDPI journal article supplement (doi:10.3390/molecules28031000), 2023-01-19
Supplement: s1 [file s1]

# Solubility and Decomposition of Organic Compounds in Subcritical Water

Erdal Yabalak <sup>1</sup>, Sema Akay <sup>2</sup>, Berkant Kayan <sup>2</sup>, A. Murat Gizir <sup>3,\*</sup> and Yu Yang <sup>4,\*</sup>

<sup>1</sup> Department of Nanotechnology and Advanced Materials, Mersin University, 33343 Mersin, Türkiye

<sup>2</sup> Department of Chemistry, Arts & Science Faculty, Aksaray University, 68100 Aksaray, Türkiye

<sup>3</sup> Department of Chemistry, Faculty of Science, Mersin University, 33342 Mersin, Türkiye

<sup>4</sup> Department of Chemistry, East Carolina University, Greenville, NC 27858, USA

\* Correspondence: agizir@mersin.edu.tr (A.M.G.); yangy@ecu.edu (Y.Y.)

**Table S1.** Carbohydrates Solubilities in Subcritical Water.

| Compound | Temperature range (K) | Pressure (bar) | Medium/Solvent    | Solubility range ( $x_2$ ) <sup>a</sup>     | Empirical equations                                  | Reference |
|----------|-----------------------|----------------|-------------------|---------------------------------------------|------------------------------------------------------|-----------|
| Glucose  |                       |                |                   | $4.45 \times 10^{-2} - 2.32 \times 10^{-1}$ |                                                      |           |
| Maltose  | 293–453               | N/A            | Subcritical water | $2.44 \times 10^{-2} - 1.47 \times 10^{-1}$ | The modified Apelblat equation or the A-UNIFAC model | [52]      |
| Xylose   |                       |                |                   | $5.08 \times 10^{-2} - 2.07 \times 10^{-1}$ |                                                      |           |

<sup>a</sup> Mole fraction solubility of compounds.; N/A: Not Available

**Table S2.** Preservative Ingredient Solubilities in Subcritical Water.

| Compound       | Temperature range (K) | Pressure (bar) | Medium/Solvent    | Solubility range ( $x_2$ ) <sup>a</sup>     | Empirical equations                                                                           | Reference |
|----------------|-----------------------|----------------|-------------------|---------------------------------------------|-----------------------------------------------------------------------------------------------|-----------|
| Methyl paraben |                       |                |                   | $2.50 \times 10^{-4} - 1.50 \times 10^{-3}$ |                                                                                               |           |
| Ethyl paraben  | 298–473               | 5–35           | Subcritical water | $0.74 \times 10^{-4} - 0.91 \times 10^{-3}$ | $\ln x_2 = \left(\frac{T_o}{T}\right) \ln x_2(T_o) + 0.5(C-1) \left(\frac{T_o}{T} - 1\right)$ | [54]      |
| Butyl paraben  |                       |                |                   | $0.18 \times 10^{-4} - 0.41 \times 10^{-3}$ |                                                                                               |           |

<sup>a</sup> Mole fraction solubility of compounds.
